# Supplementary material for: PDGFR and IGF-1R Inhibitors Induce a G2/M Arrest and Subsequent Cell Death in Human Glioblastoma Cell Lines
Source: MDPI journal article supplement (doi:10.3390/cells7090131), 2018-09-06
Supplement: s1 [file s1]

**Supplementary Materials:**

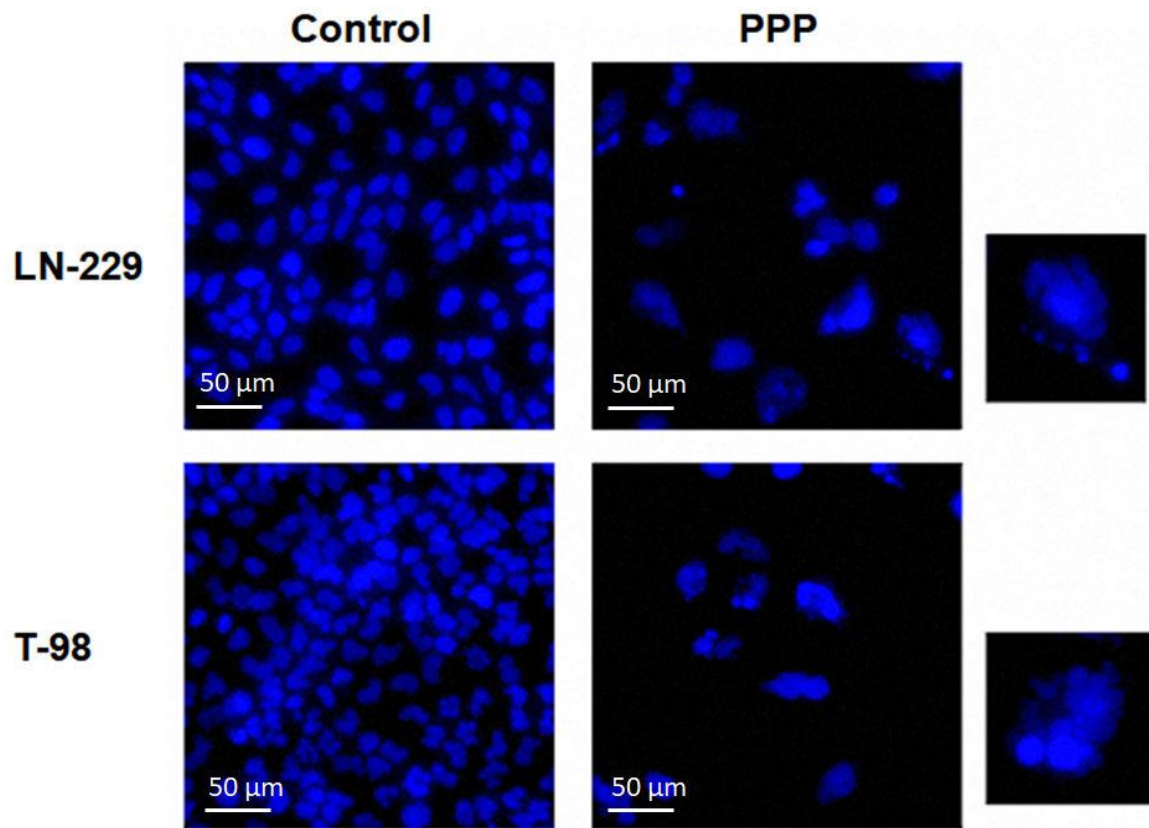

**Figure S1.** PPP effect on chromatin integrity. GBM cells were plated, treated with 500 nM PPP for 72 h and stained with Hoechst 33342 as described in Materials and Methods.

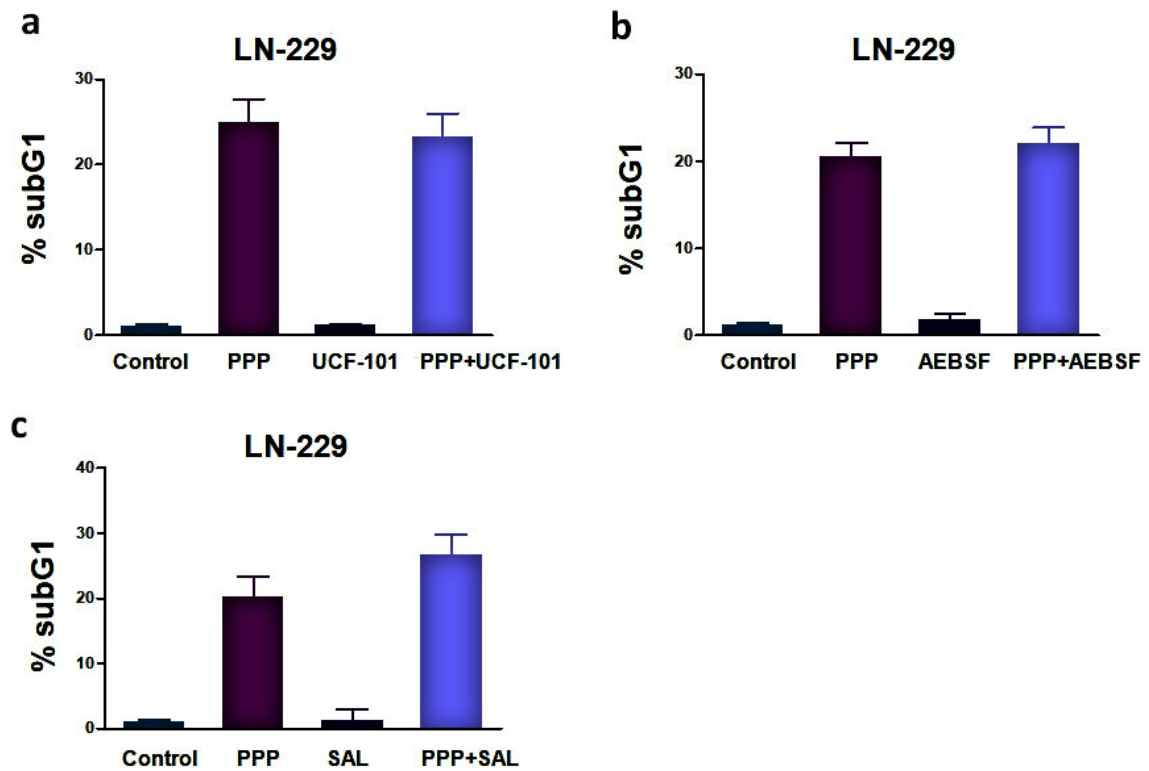

**Figure S2.** Caspase-independent mechanisms. LN-229 cells were seeded and treated with 500 nM PPP for 72 h in the presence or absence of (A) 10 mM of the Omi inhibitor Ucf-1, (B) 100 mM of the Serine protease inhibitor AEBSF or (C) 100 mM of the eIF2 $\alpha$  inhibitor Salubrinal. Cell cycle analyses were performed by flow cytometry, as described in Materials and Methods and the percentage of cells in the SubG<sub>1</sub> phase is represented. Graphs represent the average of at least three independent experiments. Error bars are the S.E.M ( $n = 4$ ).
